# Supplementary material for: Familiar Face Detection in 180ms
Source: PLOS journal article supplement (doi:10.1371/journal.pone.0136548), 2015-08-25
Supplement: S9 (10.1371/journal.pone.0136548.s009) [file journal.pone.0136548.s009]

**Table S6. Accuracy for each subject in each task.**

| <b>Task</b>                           | <b>f1</b> | <b>f2</b> | <b>f3</b> | <b>m1</b> | <b>m2</b> | <b>m4</b> | <b>m5</b> | <b>Overall</b> |
|---------------------------------------|-----------|-----------|-----------|-----------|-----------|-----------|-----------|----------------|
| <b>Familiar Face vs. Object</b>       | 94.16     | 98        | 97.12     | 94.7      | 91.79     | 84.52     | 91.67     | 92.72          |
| <b>Object vs. Familiar Face</b>       | 81.65     | 86.92     | 83.96     | 81.82     | 88.51     | 89.74     | 87.04     | 85.59          |
| <b>Unknown Face vs. Object</b>        | 88.31     | 99.36     | 97.44     | 92.9      | 93.88     | 81.76     | 95.06     | 92.77          |
| <b>Object vs. Unknown Face</b>        | 82.05     | 87.74     | 93.59     | 77.99     | 76.51     | 90.2      | 95        | 86.21          |
| <b>Familiar Face vs. Unknown Face</b> | 49.03     | 60.38     | 54.72     | 68.97     | 68.92     | 63.82     | 66.36     | 61.81          |
| <b>Unknown Face vs. Familiar Face</b> | 52.9      | 49.33     | 47.42     | 62.94     | 63.24     | 53.74     | 51.85     | 55.28          |
